# Supplementary material for: Blanching Effect on the Quality and Shelf-Life Characteristics of Fresh Cowpea Grains [Vigna unguiculata (L.) Walp.]
Source: MDPI journal article supplement (doi:10.3390/foods11091295), 2022-04-29
Supplement: s1 [file s1]

**Table S2.** Effect of temperature and blanching time on the firmness property (N) and mass gain (%) of fresh cowpeas.

| Variables and Blanching<br>Temperature (°C) | Blanching time (minutes) |                            |                             |                             |                             |                             |                            |
|---------------------------------------------|--------------------------|----------------------------|-----------------------------|-----------------------------|-----------------------------|-----------------------------|----------------------------|
|                                             | 0                        | 1                          | 2                           | 4                           | 6                           | 8                           | 10                         |
| <b>Firmness (N)</b>                         |                          |                            |                             |                             |                             |                             |                            |
| 70                                          | 6.92 <sup>a</sup> (0.02) | 5.13 <sup>bA</sup> (0.01)  | 5.32 <sup>bA</sup> (0.08)   | 5.65 <sup>bA</sup> (0.26)   | 5.26 <sup>bA</sup> (0.33)   | 5.12 <sup>bB</sup> (0.04)   | 5.57 <sup>bA</sup> (0.57)  |
| 80                                          | 6.92 <sup>a</sup> (0.02) | 5.51 <sup>bA</sup> (0.19)  | 5.38 <sup>bA</sup> (0.17)   | 5.30 <sup>bA</sup> (0.07)   | 5.43 <sup>bA</sup> (0.02)   | 5.58 <sup>bA</sup> (0.18)   | 5.85 <sup>bA</sup> (0.51)  |
| 90                                          | 6.92 <sup>a</sup> (0.02) | 6.11 <sup>abA</sup> (0.62) | 5.67 <sup>abcA</sup> (0.49) | 5.21 <sup>bcdA</sup> (0.37) | 4.61 <sup>cdA</sup> (0.28)  | 4.68 <sup>cdB</sup> (0.01)  | 4.24 <sup>dA</sup> (0.04)  |
| <b>Mass gain (%)</b>                        |                          |                            |                             |                             |                             |                             |                            |
| 70                                          | 0.00 <sup>d</sup>        | 1.89 <sup>cdA</sup> (0.15) | 3.10 <sup>bcdA</sup> (0.43) | 6.50 <sup>abA</sup> (2.40)  | 5.58 <sup>abcA</sup> (0.56) | 7.56 <sup>aB</sup> (0.29)   | 5.88 <sup>abB</sup> (0.15) |
| 80                                          | 0.00 <sup>c</sup>        | 2.66 <sup>bcA</sup> (1.33) | 5.20 <sup>abA</sup> (1.70)  | 7.27 <sup>aA</sup> (0.42)   | 7.96 <sup>aA</sup> (1.11)   | 7.89 <sup>aB</sup> (0.70)   | 7.88 <sup>aB</sup> (1.25)  |
| 90                                          | 0.00 <sup>e</sup>        | 1.85 <sup>eA</sup> (0.07)  | 5.89 <sup>dA</sup> (1.27)   | 7.29 <sup>cdA</sup> (0.14)  | 8.39 <sup>bcA</sup> (0.58)  | 10.50 <sup>adA</sup> (0.71) | 11.30 <sup>aA</sup> (0.42) |

Means of two samples (standard deviation). Mass gain (%): Each sample was analyzed in triplicate. Firmness (N): Each sample was composed of 15 cowpeas.

abc. Means with different letters in the same line differ significantly ( $p < 0.05$ ) according to the Tukey test.

ABC. Means with different capital letters in the same column for each variable differ significantly ( $p < 0.05$ ) according to the Tukey test.
