# Supplementary material for: Blanching Effect on the Quality and Shelf-Life Characteristics of Fresh Cowpea Grains [Vigna unguiculata (L.) Walp.]
Source: MDPI journal article supplement (doi:10.3390/foods11091295), 2022-04-29
Supplement: s1 [file s1]

**Table S1.** Effect of temperature and blanching time on the relative enzymatic activity (REA %) of fresh cowpeas peroxidase.

| Variables and Blanching<br>Temperature (°C) | Blanching time (minutes) |                            |                            |                             |                            |                            |                             |
|---------------------------------------------|--------------------------|----------------------------|----------------------------|-----------------------------|----------------------------|----------------------------|-----------------------------|
|                                             | 0                        | 1                          | 2                          | 4                           | 6                          | 8                          | 10                          |
| REA (%)                                     |                          |                            |                            |                             |                            |                            |                             |
| 70                                          | 100 <sup>a</sup>         | 55.24 <sup>bA</sup> (1.85) | 26.56 <sup>cA</sup> (6.99) | 25.13 <sup>cA</sup> (1.55)  | 21.00 <sup>cA</sup> (2.99) | 20.88 <sup>cA</sup> (0.60) | 25.87 <sup>cA</sup> (2.33)  |
| 80                                          | 100 <sup>a</sup>         | 53.99 <sup>bA</sup> (2.64) | 18.72 <sup>cA</sup> (2.61) | 16.28 <sup>cdB</sup> (0.75) | 9.55 <sup>deB</sup> (2.93) | 6.49 <sup>eB</sup> (0.21)  | 15.83 <sup>cdB</sup> (2.24) |
| 90                                          | 100 <sup>a</sup>         | 55.58 <sup>bA</sup> (1.67) | 18.10 <sup>cA</sup> (4.30) | 9.40 <sup>dC</sup> (0.50)   | 8.71 <sup>dB</sup> (1.61)  | 2.94 <sup>deC</sup> (0.08) | 1.25 <sup>eC</sup> (0.58)   |

Means of two samples (standard deviation). Each sample was analyzed in triplicate.

abc. Means with different letters in the same line differ significantly ( $p < 0.05$ ) according to the Tukey test.

ABC. Means with different capital letters in the same column for each variable differ significantly ( $p < 0.05$ ) according to the Tukey test.
