# Supplementary material for: Blanching Effect on the Quality and Shelf-Life Characteristics of Fresh Cowpea Grains [Vigna unguiculata (L.) Walp.]
Source: MDPI journal article supplement (doi:10.3390/foods11091295), 2022-04-29
Supplement: s1 [file s1]

## Supplementary Figure Legend

**Figure S1.** Position of fresh cowpeas for the instrumental firmness analysis.

P1 - length, smallest axis; P2 - width, middle axis; P3 - height, longest axis

Source: Adapted from [19]

## Supplementary Tables Legends

**Table S1.** Effect of temperature and blanching time on the relative enzymatic activity (REA %) of fresh cowpea peroxidase.

Means of two samples (standard deviation). Each sample was analyzed in triplicate.

abc. Means with different letters in the same line differ significantly ( $p < 0.05$ ) according to the Tukey test.

ABC. Means with different capital letters in the same column for each variable differ significantly ( $p < 0.05$ ) according to the Tukey test.

**Table S2.** Effect of temperature and blanching time on the firmness property (N) and mass gain (%) of fresh cowpeas.

Means of two samples (standard deviation). Mass gain (%): Each sample was analyzed in triplicate. Firmness (N): Each sample was composed of 15 cowpeas.

abc. Means with different letters in the same line differ significantly ( $p < 0.05$ ) according to the Tukey test.

ABC. Means with different capital letters in the same column for each variable differ significantly ( $p < 0.05$ ) according to the Tukey test.

**Table S3.** Pearson's correlation between the mass gain parameter and firmness of fresh cowpeas submitted to blanching.

**Table S4.** Effect of temperature and blanching time on fresh cowpea color according to the  $L^*$ ,  $a^*$ ,  $b^*$  and chroma indices.

Means of two samples (standard deviation). Each sample was analyzed in triplicate.

abc. Means with different letters in the same line differ significantly ( $p < 0.05$ ) according to the Tukey test.

ABC. Means with different capital letters in the same column for each variable differ significantly ( $p < 0.05$ ) according to the Tukey test.

**Table S5.** Effect of refrigerated storage (4.90 °C) on hydrogen potential (pH), Total Titratable Acidity (TTA), mesophilic (Log CFU/g) and psychrotrophic (Log CFU/g) bacteria in the fresh cowpea (FC) and blanched fresh cowpea (BFC) samples at 70 °C for 4 min.

Means of two samples (standard deviation). Each sample was analyzed in triplicate.

abc. Means with different letters in the same line differ significantly ( $p < 0.05$ ) according to the Tukey test.

\*Means followed by an asterisk differ significantly ( $p < 0.05$ ) from the control sample (FC) according to the Student's t-test.

**Table S6.** Coliform count at 45 °C during the refrigerated storage period of fresh cowpeas (FC) and blanched fresh cowpeas (BFC).

Means of two samples. Each sample was analyzed in triplicate.
