# Supplementary material for: Blanching Effect on the Quality and Shelf-Life Characteristics of Fresh Cowpea Grains [Vigna unguiculata (L.) Walp.]
Source: MDPI journal article supplement (doi:10.3390/foods11091295), 2022-04-29
Supplement: s1 [file s1]

**Table S4.** Effect of temperature and blanching time on fresh cowpeas color according to the  $L^*$ ,  $a^*$ ,  $b^*$  and chroma indices.

| Variables and Blanching<br>Temperature (°C) |  | Blanching time (minutes)   |                              |                              |                              |                              |                             |                             |
|---------------------------------------------|--|----------------------------|------------------------------|------------------------------|------------------------------|------------------------------|-----------------------------|-----------------------------|
|                                             |  | CONTROL                    | 1                            | 2                            | 4                            | 6                            | 8                           | 10                          |
| <i>L*</i>                                   |  |                            |                              |                              |                              |                              |                             |                             |
| 70                                          |  | 76.93 <sup>ab</sup> (1.35) | 75.63 <sup>abA</sup> (0.96)  | 78.95 <sup>aA</sup> (1.90)   | 77.47 <sup>abA</sup> (2.02)  | 72.10 <sup>bA</sup> (0.93)   | 72.40 <sup>abA</sup> (1.27) | 71.85 <sup>bA</sup> (2.72)  |
| 80                                          |  | 76.93 <sup>a</sup> (1.35)  | 75.90 <sup>aA</sup> (0.67)   | 75.08 <sup>aA</sup> (4.27)   | 75.59 <sup>aA</sup> (3.05)   | 72.14 <sup>aA</sup> (2.14)   | 73.31 <sup>aA</sup> (0.77)  | 71.14 <sup>aA</sup> (2.14)  |
| 90                                          |  | 76.93 <sup>a</sup> (1.35)  | 72.30 <sup>aA</sup> (3.94)   | 72.47 <sup>aA</sup> (2.11)   | 73.15 <sup>aA</sup> (1.08)   | 73.36 <sup>aA</sup> (3.32)   | 72.66 <sup>aA</sup> (0.02)  | 71.79 <sup>aA</sup> (2.93)  |
| <i>a*</i>                                   |  |                            |                              |                              |                              |                              |                             |                             |
| 70                                          |  | -1.73 <sup>b</sup> (0.35)  | -2.07 <sup>cA</sup> (0.70)   | -2.63 <sup>cA</sup> (0.29)   | -2.94 <sup>cB</sup> (0.15)   | -0.46 <sup>abB</sup> (0.10)  | -0.35 <sup>aB</sup> (0.09)  | 0.58 <sup>aA</sup> (0.31)   |
| 80                                          |  | -1.73 <sup>ab</sup> (0.35) | -1.79 <sup>abA</sup> (0.82)  | -1.54 <sup>abA</sup> (1.59)  | -2.34 <sup>bB</sup> (0.48)   | -0.55 <sup>abB</sup> (0.11)  | -0.61 <sup>abB</sup> (0.07) | 0.77 <sup>aA</sup> (0.07)   |
| 90                                          |  | -1.73 <sup>c</sup> (0.35)  | -0.95 <sup>bcA</sup> (0.67)  | -0.38 <sup>abA</sup> (0.38)  | -0.29 <sup>abA</sup> (0.04)  | 0.61 <sup>aA</sup> (0.16)    | 0.54 <sup>aA</sup> (0.07)   | 0.66 <sup>aA</sup> (0.21)   |
| <i>b*</i>                                   |  |                            |                              |                              |                              |                              |                             |                             |
| 70                                          |  | 15.07 <sup>a</sup> (0.18)  | 14.19 <sup>abcA</sup> (0.93) | 14.97 <sup>abA</sup> (0.35)  | 14.09 <sup>abcA</sup> (0.68) | 12.46 <sup>bcdA</sup> (0.38) | 11.15 <sup>dA</sup> (0.45)  | 11.72 <sup>cdA</sup> (1.05) |
| 80                                          |  | 15.07 <sup>a</sup> (0.18)  | 12.73 <sup>abA</sup> (0.88)  | 12.68 <sup>abAB</sup> (1.22) | 12.46 <sup>abAB</sup> (0.56) | 11.34 <sup>bA</sup> (1.14)   | 11.67 <sup>bA</sup> (0.20)  | 10.90 <sup>bA</sup> (0.85)  |
| 90                                          |  | 15.07 <sup>a</sup> (0.18)  | 11.17 <sup>abA</sup> (1.80)  | 11.13 <sup>abB</sup> (0.66)  | 11.22 <sup>abB</sup> (0.24)  | 11.24 <sup>abA</sup> (1.89)  | 12.08 <sup>abA</sup> (1.01) | 10.70 <sup>bA</sup> (0.33)  |
| Chroma                                      |  |                            |                              |                              |                              |                              |                             |                             |
| 70                                          |  | 15.07 <sup>a</sup> (0.14)  | 14.34 <sup>abcA</sup> (1.02) | 15.20 <sup>aA</sup> (0.30)   | 14.39 <sup>abA</sup> (0.69)  | 12.47 <sup>bcdA</sup> (0.38) | 11.15 <sup>dA</sup> (0.45)  | 11.74 <sup>cdA</sup> (1.04) |
| 80                                          |  | 15.07 <sup>a</sup> (0.14)  | 12.86 <sup>abA</sup> (0.99)  | 12.81 <sup>abAB</sup> (1.40) | 12.68 <sup>abAB</sup> (0.63) | 11.35 <sup>bA</sup> (1.15)   | 11.68 <sup>abA</sup> (0.21) | 10.93 <sup>bA</sup> (0.85)  |
| 90                                          |  | 15.07 <sup>a</sup> (0.14)  | 11.22 <sup>abA</sup> (1.85)  | 11.14 <sup>abB</sup> (0.67)  | 11.22 <sup>abB</sup> (0.24)  | 11.26 <sup>abA</sup> (1.87)  | 12.09 <sup>abA</sup> (1.00) | 10.72 <sup>aA</sup> (0.34)  |

Means of two samples (standard deviation). Each sample was analyzed in triplicate.

<sup>abc</sup>. Means with different letters in the same line differ significantly ( $p < 0.05$ ) according to the Tukey test.

<sup>ABC</sup>. Means with different capital letters in the same column for each variable differ significantly ( $p < 0.05$ ) according to the Tukey test.
