# Supplementary material for: Blanching Effect on the Quality and Shelf-Life Characteristics of Fresh Cowpea Grains [Vigna unguiculata (L.) Walp.]
Source: MDPI journal article supplement (doi:10.3390/foods11091295), 2022-04-29
Supplement: s1 [file s1]

**Table S5.** Effect of refrigerated storage (4.90 °C) on hydrogen potential (pH), Total Titratable Acidity (TTA), mesophilic (Log CFU/g) and psychrotrophic (Log CFU/g) bacteria in the fresh cowpeas (FC) and blanched fresh cowpeas (BFC) samples at 70 °C for 4 min.

| Variable and Samples       | Storage time (days)        |                          |                            |                           |                           |                             |                           |                            |
|----------------------------|----------------------------|--------------------------|----------------------------|---------------------------|---------------------------|-----------------------------|---------------------------|----------------------------|
|                            | 0                          | 2                        | 4                          | 6                         | 8                         | 10                          | 12                        | 14                         |
| <b>pH</b>                  |                            |                          |                            |                           |                           |                             |                           |                            |
| FC                         | 6.79 <sup>a</sup> (0.05)   | 6.79 <sup>a</sup> (0.11) | 6.56 <sup>bc</sup> (0.09)  | 6.54 <sup>bc</sup> (0.16) | 6.64 <sup>ab</sup> (0.10) | 6.42 <sup>c</sup> (0.07)    | 6.45 <sup>c</sup> (0.05)  | 6.40 <sup>c</sup> (0.02)   |
| BFC                        | 6.66 <sup>bc*</sup> (0.04) | 6.81 <sup>a</sup> (0.11) | 6.76 <sup>ab*</sup> (0.06) | 6.69 <sup>bc</sup> (0.05) | 6.69 <sup>bc</sup> (0.05) | 6.70 <sup>abc*</sup> (0.05) | 6.62 <sup>c*</sup> (0.03) | 6.66 <sup>bc*</sup> (0.07) |
| <b>TTA</b>                 |                            |                          |                            |                           |                           |                             |                           |                            |
| <b>(% Citric acid m/V)</b> |                            |                          |                            |                           |                           |                             |                           |                            |
| FC                         | 0.33 <sup>c</sup> (0.00)   | 0.27 <sup>d</sup> (0.02) | 0.30 <sup>cd</sup> (0.02)  | 0.47 <sup>ab</sup> (0.02) | 0.45 <sup>b</sup> (0.02)  | 0.47 <sup>ab</sup> (0.04)   | 0.50 <sup>a</sup> (0.01)  | 0.50 <sup>a</sup> (0.01)   |
| BFC                        | 0.31 <sup>c*</sup> (0.00)  | 0.29 <sup>c</sup> (0.02) | 0.31 <sup>c</sup> (0.03)   | 0.32 <sup>c*</sup> (0.01) | 0.36 <sup>b*</sup> (0.01) | 0.37 <sup>b*</sup> (0.01)   | 0.37 <sup>b*</sup> (0.00) | 0.43 <sup>a*</sup> (0.04)  |

Means of two samples (standard deviation). Each sample was analyzed in triplicate.

<sup>abc</sup>. Means with different letters in the same line differ significantly (p<0.05) according to the Tukey test.

\*Means followed by an asterisk differ significantly (p<0.05) from the control sample (FC) according to the Student's t-test.
