# Supplementary material for: Blanching Effect on the Quality and Shelf-Life Characteristics of Fresh Cowpea Grains [Vigna unguiculata (L.) Walp.]
Source: MDPI journal article supplement (doi:10.3390/foods11091295), 2022-04-29
Supplement: s1 [file s1]

**Table S3.** Pearson's correlation between the mass gain parameter and firmness of fresh cowpeas submitted to blanching.

| <b>Variables</b>     | <b>Mass Gain (%)</b> |                | <b>Firmness (N)</b> |                |
|----------------------|----------------------|----------------|---------------------|----------------|
|                      | <b>r</b>             | <b>p-value</b> | <b>r</b>            | <b>p-value</b> |
| <b>Mass gain (%)</b> | 1                    | 0              | -0.640              | < 0.0001       |
| <b>Firmness (N)</b>  | -0.640               | < 0.0001       | 1                   | 0              |
