# Supplementary material for: Blanching Effect on the Quality and Shelf-Life Characteristics of Fresh Cowpea Grains [Vigna unguiculata (L.) Walp.]
Source: MDPI journal article supplement (doi:10.3390/foods11091295), 2022-04-29
Supplement: s1 [file s1]

**Table S6.** Coliform count at 45 °C during the refrigerated storage period of fresh cowpeas (FC) and blanched fresh cowpeas (BFC).

| Samples | Storage time (days) |        |        |        |        |      |      |      |
|---------|---------------------|--------|--------|--------|--------|------|------|------|
|         | 0                   | 2      | 4      | 6      | 8      | 10   | 12   | 14   |
| FC      | <3.0                | >1,100 | >1,100 | >1,100 | >1,100 | -    | -    | -    |
| BFC     | <3.0                | <3.0   | <3.0   | <3.0   | <3.0   | <3.0 | <3.0 | <3.0 |

Means of two samples. Each sample was analyzed in triplicate.
